# Supplementary material for: Reverse Screening of Boronic Acid Derivatives: Analysis of Potential Antiproliferative Effects on a Triple-Negative Breast Cancer Model In Vitro
Source: MDPI journal article supplement (doi:10.3390/inorganics11040165), 2023-04-14
Supplement: s1 [file s1]

## Supplementary material

### Reverse screening of boronic acid derivatives: Analysis of potential antiproliferative effects on a triple-negative breast cancer model *in vitro*.

Miguel Ortiz-Flores, Marcos Gonzalez-Perez, Andrés Portilla, Marvin A. Soriano-Ursúa, Javier Perez-Duran, Araceli Montoya, Guillermo Ceballos, Nayelli Nájera.

**Table S1.** UniProt entries of the therapeutic targets predicted in the different employed servers.

| UniProt Entry | Protein name                                                          |
|---------------|-----------------------------------------------------------------------|
| P22303        | Acetylcholinesterase                                                  |
| Q13085        | Acetyl-CoA carboxylase 1                                              |
| O00763        | Acetyl-CoA carboxylase 2                                              |
| P29274        | Adenosine A2a receptor                                                |
| P15144        | Aminopeptidase N                                                      |
| P09917        | Arachidonate 5-lipoxygenase                                           |
| P05067        | Beta amyloid A4 protein                                               |
| P08588        | Beta-1 adrenergic receptor                                            |
| P13945        | Beta-3 adrenergic receptor                                            |
| P06276        | Butyrylcholinesterase                                                 |
| Q16566        | CaM kinase IV                                                         |
| P00915        | Carbonic anhydrase I                                                  |
| P00918        | Carbonic anhydrase II                                                 |
| P22748        | Carbonic anhydrase IV                                                 |
| Q16790        | Carbonic anhydrase IX                                                 |
| O43570        | Carbonic anhydrase XII                                                |
| P07339        | Cathepsin D                                                           |
| P08311        | Cathepsin G                                                           |
| P11511        | Cytochrome P450 19A1                                                  |
| P05177        | Cytochrome P450 1A2                                                   |
| P20813        | Cytochrome P450 2B6                                                   |
| P08684        | Cytochrome P450 3A4                                                   |
| Q02127        | Dihydroorotate dehydrogenase                                          |
| Q9UHL4        | Dipeptidyl peptidase II                                               |
| Q86TI2        | Dipeptidyl peptidase IX                                               |
| Q6V1X1        | Dipeptidyl peptidase VIII                                             |
| E5KPS3        | DNA-(apurinic or apyrimidinic site) lyase                             |
| P14416        | Dopamine D2 receptor                                                  |
| P35462        | Dopamine D3 receptor                                                  |
| P21917        | Dopamine D4 receptor                                                  |
| Q01959        | Dopamine transporter                                                  |
| O14733        | Dual specificity mitogen-activated protein kinase kinase 7            |
| Q9HAZ1        | Dual specificity protein kinase CLK4                                  |
| P51452        | Dual specificity protein phosphatase 3                                |
| Q13627        | Dual-specificity tyrosine-phosphorylation regulated kinase 1A         |
| Q99714        | Endoplasmic reticulum-associated amyloid beta-peptide-binding protein |
| P25101        | Endothelin receptor ET-A                                              |
| P00533        | Epidermal growth factor receptor erbB1                                |
| P14061        | Estradiol 17-beta-dehydrogenase 1                                     |
| P37059        | Estradiol 17-beta-dehydrogenase 2                                     |
| P11474        | Estrogen receptor alpha                                               |

|        |                                                             |
|--------|-------------------------------------------------------------|
| Q92731 | Estrogen receptor beta                                      |
| P11166 | Glucose transporter                                         |
| P42262 | Glutamate receptor ionotropic, AMPA 2                       |
| P09211 | Glutathione S-transferase Pi                                |
| Q9Y2T6 | G-protein coupled receptor 55                               |
| P35367 | Histamine H1 receptor                                       |
| Q9Y5N1 | Histamine H3 receptor                                       |
| Q13547 | Histone deacetylase 1                                       |
| Q9UBN7 | Histone deacetylase 6                                       |
| Q8TDS4 | Hydroxycarboxylic acid receptor 2                           |
| Q07820 | Induced myeloid leukemia cell differentiation protein Mcl-1 |
| Q13887 | Kruppel-like factor 5                                       |
| P03956 | Matrix metalloproteinase 1                                  |
| P45452 | Matrix metalloproteinase 13                                 |
| P50281 | Matrix metalloproteinase 14                                 |
| P08253 | Matrix metalloproteinase 2                                  |
| P14780 | Matrix metalloproteinase 9                                  |
| P21397 | Monoamine oxidase A                                         |
| P27338 | Monoamine oxidase B                                         |
| P11229 | Muscarinic acetylcholine receptor M1                        |
| P20309 | Muscarinic acetylcholine receptor M3                        |
| P08473 | Neprilysin                                                  |
| P19838 | Nuclear factor NF-kappa-B p105 subunit                      |
| Q07869 | Peroxisome proliferator-activated receptor alpha            |
| P37231 | Peroxisome proliferator-activated receptor gamma            |
| P09874 | Poly [ADP-ribose] polymerase-1                              |
| P06401 | Progesterone receptor                                       |
| P48147 | Prolyl endopeptidase                                        |
| P20618 | Proteasome component C5                                     |
| P16083 | Quinone reductase 2                                         |
| Q9BQF6 | Sentrin-specific protease 7                                 |
| P37023 | Serine/threonine-protein kinase receptor R3                 |
| P08908 | Serotonin 1a (5-HT1a) receptor                              |
| P28223 | Serotonin 2a (5-HT2a) receptor                              |
| P41595 | Serotonin 2b (5-HT2b) receptor                              |
| P28335 | Serotonin 2c (5-HT2c) receptor                              |
| P50406 | Serotonin 6 (5-HT6) receptor                                |
| P31645 | Serotonin transporter                                       |
| P40763 | Signal transducer and activator of transcription 3          |
| P21453 | Sphingosine 1-phosphate receptor Edg-1                      |
| P40238 | Thrombopoietin receptor                                     |
| P04818 | Thymidylate synthase                                        |
| P10827 | Thyroid hormone receptor alpha                              |
| Q64127 | Transcription intermediary factor 1-alpha                   |
| P02766 | Transthyretin                                               |
| P36888 | Tyrosine-protein kinase receptor FLT3                       |
| P35968 | Vascular endothelial growth factor receptor 2               |
| P47989 | Xanthine dehydrogenase                                      |

---

**Table S2.** CLogP and LogS values of the five tested compounds. Calculated by using ChemDraw Ver18.0.

| Compound | ClogP | LogS   |
|----------|-------|--------|
| 1        | 2.102 | -2.526 |
| 2        | 4.240 | -4.112 |
| 3        | 4.403 | -2.260 |
| 4        | 3.943 | -4.085 |
| 5        | 2.442 | -2.304 |
